# Supplementary material
Source: MDPI journal article supplement (https://www.mdpi.com/2071-1050/12/15/5924)
Supplement: s1 [file s1]

Supplementary table 1.

Literature search performed through Scopus, Pubmed, and Embase – 31-12-2019

| <b>Scopus searches</b>                                                                                                                                |                                          |                                   |
|-------------------------------------------------------------------------------------------------------------------------------------------------------|------------------------------------------|-----------------------------------|
| <i>Search terms</i>                                                                                                                                   | <i>Items found in search<sup>1</sup></i> | <i>Number of sources selected</i> |
| TITLE-ABS-KEY ( intervention OR policy AND consumption ) AND DOCTYPE ( re ) AND PUBYEAR > 1999                                                        | 7698                                     | 8                                 |
| TITLE-ABS-KEY ( ( intervention OR policy ) AND animal AND food AND consumption AND decrease ) AND DOCTYPE ( re ) AND PUBYEAR > 1999                   | 35                                       | 3                                 |
| TITLE-ABS-KEY ( ( intervention OR policy ) AND "animal-based" AND food ) AND ( LIMIT-TO ( DOCTYPE , "re" ) ) AND PUBYEAR > 1999                       | 17                                       | 2                                 |
| TITLE-ABS-KEY ( ( intervention OR policy ) AND "meat consumption" ) AND ( LIMIT-TO ( DOCTYPE , "re" ) ) AND PUBYEAR > 1999                            | 38                                       | 11                                |
| TITLE-ABS-KEY ( ( intervention OR policy ) AND "plant-based" AND food ) AND ( LIMIT-TO ( DOCTYPE , "re" ) ) AND PUBYEAR > 1999                        | 76                                       | 0                                 |
| TITLE-ABS-KEY ( ( intervention OR policy ) AND "plant" AND food AND consumption AND increase ) AND ( LIMIT-TO ( DOCTYPE , "re" ) ) AND PUBYEAR > 1999 | 38                                       | 1                                 |
| TITLE-ABS-KEY ( intervention OR policy AND nutrition OR diet AND sustainab* AND environm* ) AND DOCTYPE ( re ) AND PUBYEAR > 1999                     | 222                                      | 10                                |
| <b>Total number of sources selected</b>                                                                                                               | <b>572</b>                               | <b>35</b>                         |

1 Selection based on relevance of title and abstract

| <b>Pubmed searches</b>                                                                                                                                                   |                                          |                                   |
|--------------------------------------------------------------------------------------------------------------------------------------------------------------------------|------------------------------------------|-----------------------------------|
| <i>Search terms</i>                                                                                                                                                      | <i>Items found in search<sup>1</sup></i> | <i>Number of sources selected</i> |
| (intervention) OR policy) AND overconsumption)) AND "review"[Publication Type])) AND ("2000"[Date - Publication] : "3000"[Date - Publication])                           | 92                                       | 4                                 |
| (intervention OR policy) AND animal AND food AND consumption AND decrease AND "review"[Publication Type]) AND ("2000"[Date - Publication] : "3000"[Date - Publication])  | 170                                      | 1                                 |
| (intervention OR policy) AND "animal-based" AND food AND "review"[Publication Type]) AND ("2000"[Date - Publication] : "3000"[Date - Publication])                       | 41                                       | 2                                 |
| (intervention OR policy) AND "meat consumption" AND "review"[Publication Type]) AND ("2000"[Date - Publication] : "3000"[Date - Publication])                            | 75                                       | 7                                 |
| (intervention OR policy) AND "plant-based" AND food AND "review"[Publication Type]) AND ("2000"[Date - Publication] : "3000"[Date - Publication])                        | 215                                      | 1                                 |
| (intervention OR policy) AND "plant" AND food AND consumption AND increase AND "review"[Publication Type]) AND ("2000"[Date - Publication] : "3000"[Date - Publication]) | 228                                      | 2                                 |
| <b>Total number of sources selected</b>                                                                                                                                  | <b>821</b>                               | <b>17</b>                         |

<sup>1</sup> Selection based on relevance of title and abstract

| Embase search |                                                                            |                                    |                            |
|---------------|----------------------------------------------------------------------------|------------------------------------|----------------------------|
|               | Search terms                                                               | Items found in search <sup>1</sup> | Number of sources selected |
| #1            | ('intervention study'/exp/mj OR 'intervent* stud*':ti) AND [2010-2019]/py  | 4,269                              |                            |
| #2            | ('policy'/exp/mj OR 'polic*':ti) AND [2010-2019]/py                        | 45,1                               |                            |
| #3            | ('health care policy'/exp/mj OR 'health care poli*':ti) AND [2010-2019]/py | 25,018                             |                            |

|     |                                                                                        |         |  |
|-----|----------------------------------------------------------------------------------------|---------|--|
| #4  | ('nutrition policy'/exp OR 'nutrition* polic*':ti) AND [2010-2019]/py                  | 996     |  |
| #5  | ('sustainable development'/exp/mj OR 'sustainable development*':ti) AND [2010-2019]/py | 1,653   |  |
| #6  | ('environmental protection'/exp/mj OR 'environment* protect*':ti) AND [2010-2019]/py   | 16,374  |  |
| #7  | 'food intake'/exp/mj OR 'food intake*':ti OR 'nutri* intake*':ti                       | 105,315 |  |
| #8  | 'food'/exp/mj                                                                          | 463,541 |  |
| #9  | 'nutrition'/exp/mj AND ('nutrition*':ti OR 'nutriënt*':ti OR 'diet*':ti)               | 230,012 |  |
| #10 | 'over consump*':ti OR 'overconsum*':ti                                                 | 160     |  |
| #11 | 'sustainable food*':ti                                                                 | 127     |  |
| #12 | #1 AND #7                                                                              | 42      |  |
| #13 | #1 AND #8 AND 'review'/it                                                              | 13      |  |
| #14 | #1 AND #9 AND 'review'/it                                                              | 27      |  |
| #15 | #1 AND #10                                                                             | 0       |  |
| #16 | #1 AND #11                                                                             | 0       |  |
| #17 | #2 AND #7 AND 'review'/it                                                              | 18      |  |
| #18 | #2 AND #8 AND 'review'/it                                                              | 66      |  |
| #19 | #2 AND #9 AND 'review'/it                                                              | 112     |  |
| #20 | #2 AND #10                                                                             | 1       |  |
| #21 | #2 AND #11                                                                             | 9       |  |
| #22 | #3 AND #7 AND 'review'/it                                                              | 13      |  |
| #23 | #3 AND #8 AND 'review'/it                                                              | 50      |  |
| #24 | #3 AND #9 AND 'review'/it                                                              | 96      |  |
| #25 | #3 AND #10                                                                             | 1       |  |
| #26 | #3 AND #11                                                                             | 6       |  |
| #27 | #4 AND #7                                                                              | 54      |  |
| #28 | #4 AND #8 AND 'review'/it                                                              | 28      |  |

|     |                                                     |        |           |
|-----|-----------------------------------------------------|--------|-----------|
| #29 | #4 AND #9 AND 'review'/it                           | 59     |           |
| #30 | #4 AND #10                                          | 0      |           |
| #31 | #4 AND #11                                          | 2      |           |
| #32 | #5 AND #7                                           | 7      |           |
| #33 | #5 AND #8                                           | 28     |           |
| #34 | #5 AND #9                                           | 18     |           |
| #35 | #5 AND #10                                          | 0      |           |
| #36 | #5 AND #11                                          | 6      |           |
| #37 | #6 AND #7                                           | 42     |           |
| #38 | #6 AND #8 AND 'review'/it                           | 20     |           |
| #39 | #6 AND #9 AND 'review'/it                           | 13     |           |
| #40 | #6 AND #10                                          | 0      |           |
| #41 | #6 AND #11                                          | 15     |           |
| #42 | #12 OR #13 OR #14 OR #15 OR #16 OR #17 OR #18 OR    | 459    |           |
| #43 | #42 AND ('Article'/it OR 'Review'/it)               | 413    |           |
| #44 | 'environmental protection'/exp OR 'environment*':ti | 243,3  |           |
| #45 | 'sustainable development'/exp OR 'sustain*':ti      | 51,304 |           |
| #46 | #43 AND (#44 OR #45)                                | 129    | 20        |
| #47 | #43 NOT #46                                         | 284    | 67        |
|     | <b>Total number of sources selected</b>             |        | <b>87</b> |

1 Selection based on relevance of title and abstract
